# Supplementary material for: Surface Modification of a Nanoporous Carbon Photoanode upon Irradiation
Source: PubMed Central journal article supplement (PMC6273716; doi:10.3390/molecules21111611), 2016-11-23
Supplement: molecules-21-01611-s001.pdf [file molecules-21-01611-s001.pdf]

## Supplementary Materials: Surface Modification of a Nanoporous Carbon Photoanode upon Irradiation

Alicia Gomis-Berenguer, Inmaculada Velo-Gala, Enrique Rodríguez-Castellón and Conchi O. Ania

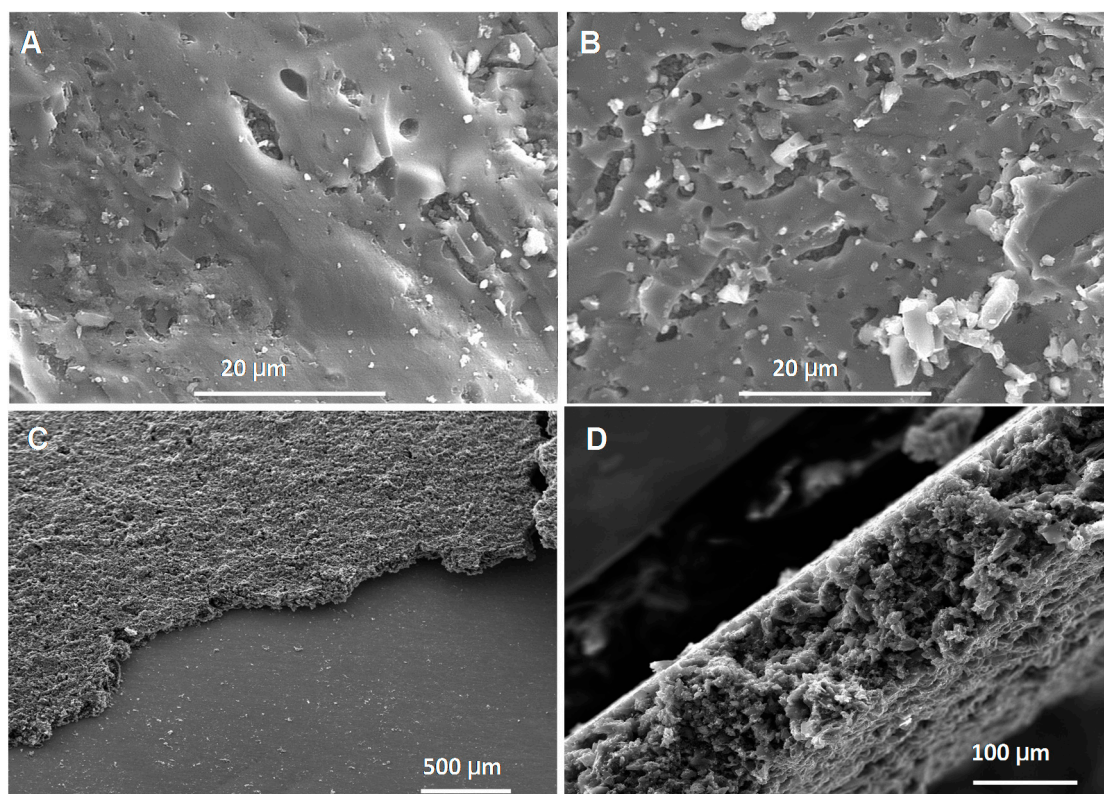

**Figure S1.** SEM images of the investigated carbon materials (A) NC and (B) NCox, and examples of the photoanodes (C, D).

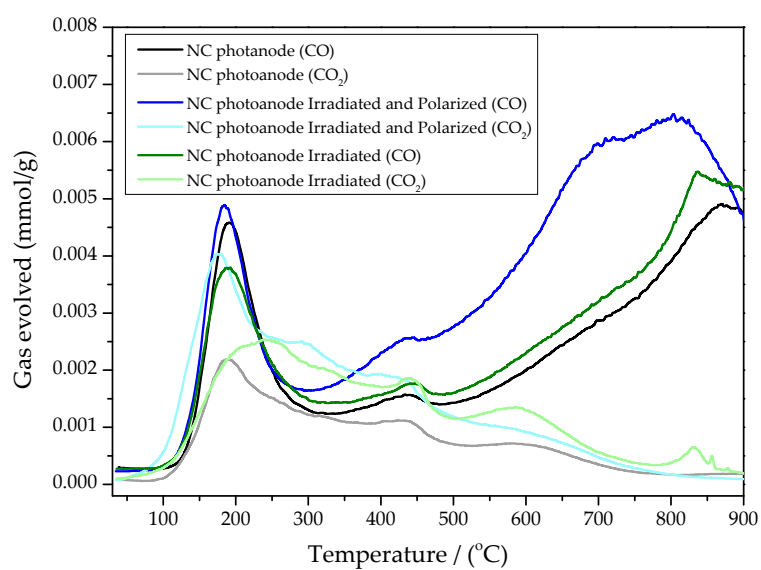

**Figure S2.** CO and CO<sub>2</sub> TPD-MS profiles for the as prepared carbon photoanode, and after irradiation and polarization at 1 V vs Ag/AgCl.

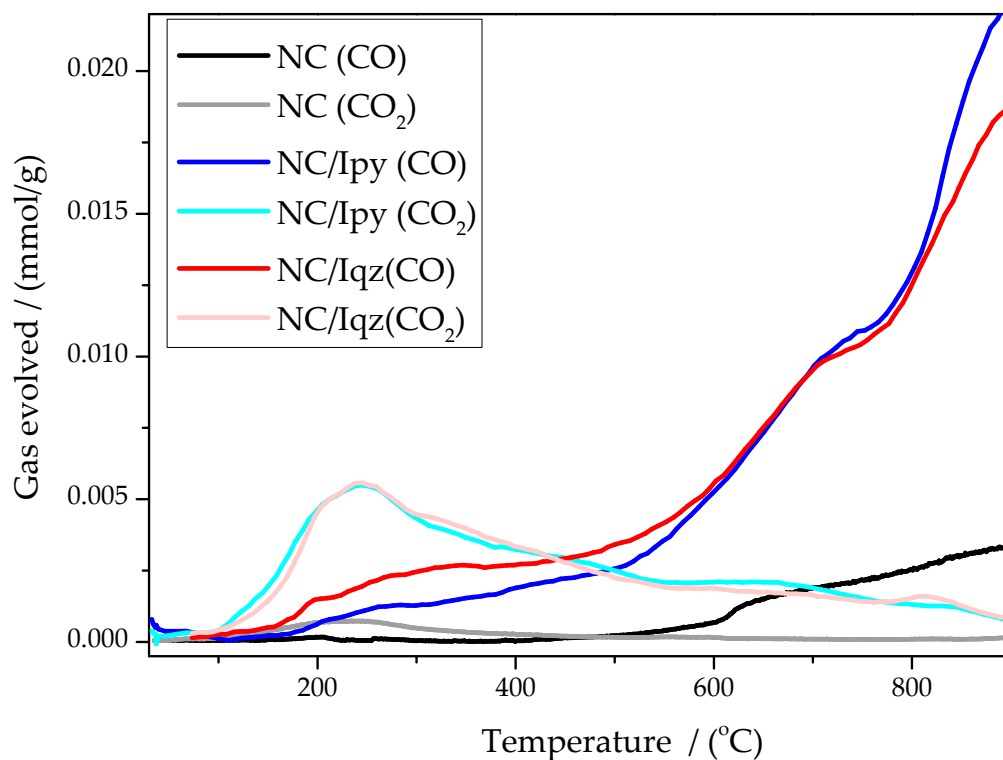

**Figure S3.** CO and CO<sub>2</sub> TPD-MS profiles for the nanoporous carbon before and after light exposure with different irradiation conditions.

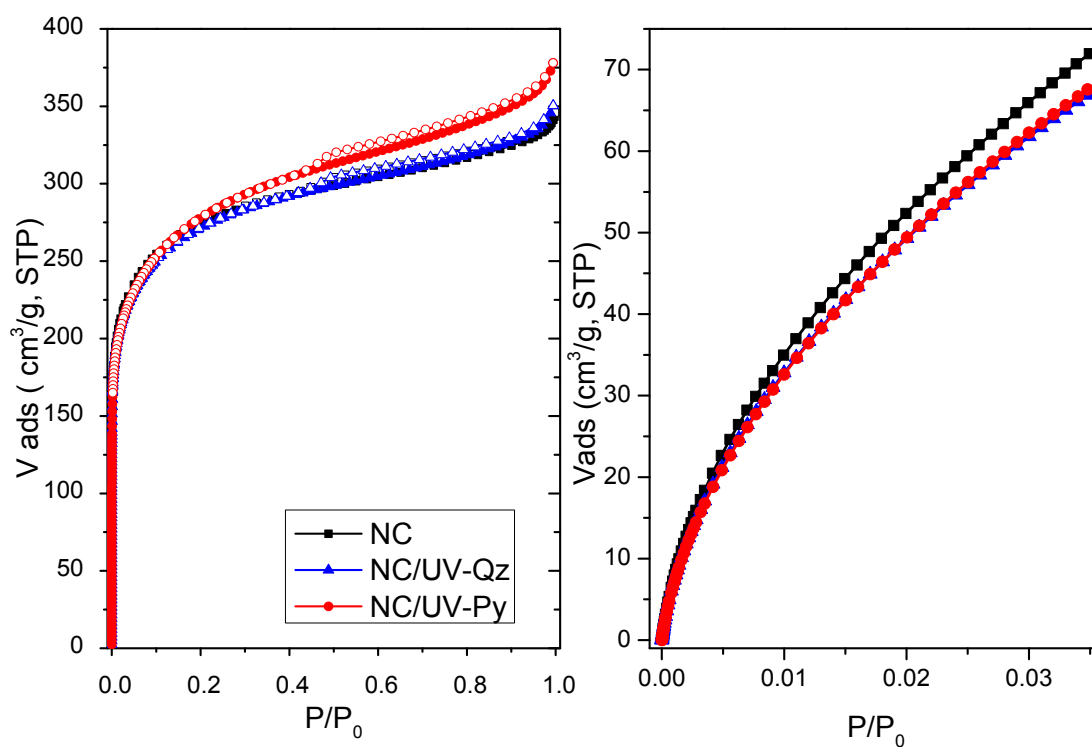

**Figure S4.** High resolution adsorption/desorption isotherms of the studied nanoporous carbons: (left) nitrogen at 77K, and (right) carbon dioxide at 273K.
